# Supplementary material for: Influences of doping and thermal stability on the catalytic performance of CuO/Ce20M1Ox (M = Zr, Cr, Mn, Fe, Co, Sn) catalysts for NO reduction by CO
Source: Royal Society of Chemistry journal article supplement (doi:10.1039/c6ra21740k), 2016-01-01
Supplement: c6ra21740k1.pdf [file c6ra21740k1.pdf]

**Influences of doping and thermal stability on the catalytic performance of CuO/Ce<sub>20</sub>M<sub>1</sub>O<sub>x</sub> (M = Zr, Cr, Mn, Fe, Co, Sn) catalysts for NO reduction by CO**

Changshun Deng, Junning Qian, Chuxuan Yu, Yunan Yi, Pan Zhang, Wei Li, Lihui Dong,\* Bin Li,\* and Minguang Fan

Guangxi Key Laboratory Petrochemical Resource Processing and Process Intensification Technology, School of Chemistry and Chemical Engineering, Guangxi University, Nanning 530004, P.R. China

\*Corresponding author.

E-mail: donglihui2005@126.com (L. H. Dong).

E-mail: binli@gxu.edu.cn (B. Li.). Tel.: +86 07713233718.

## Supplementary data

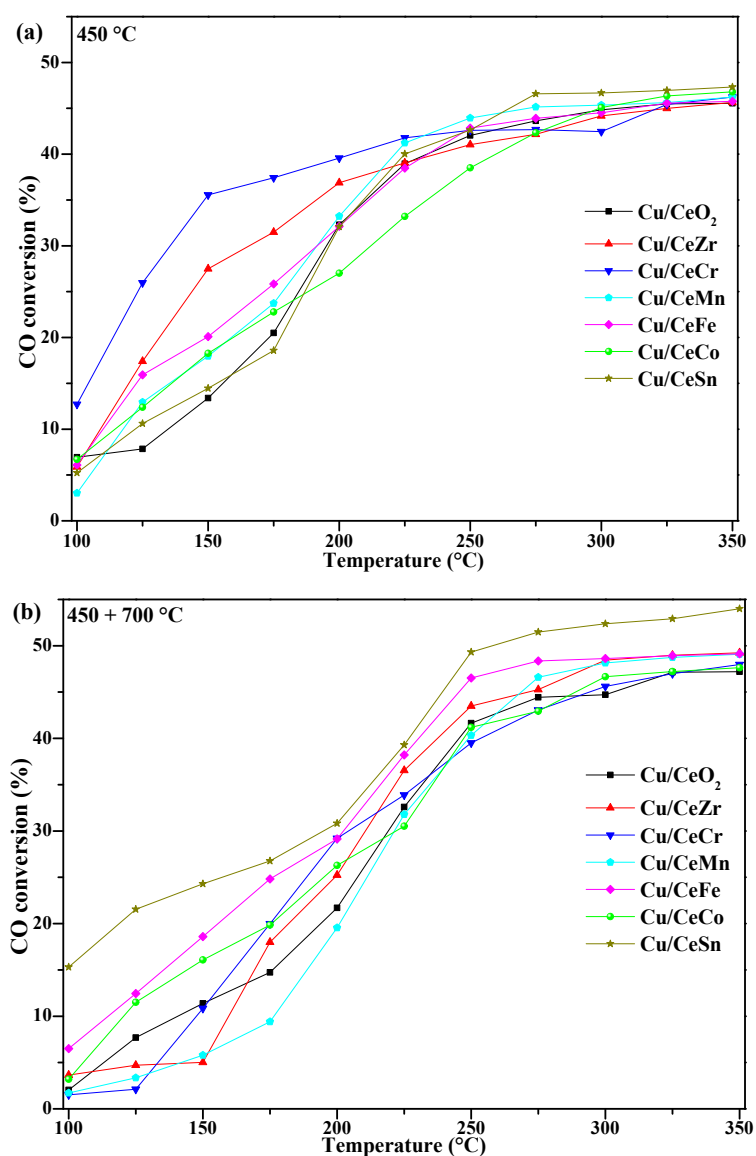

**Fig. S1.** The results of CO conversion (%) over these fresh (a) and aged (b) samples as a function of reaction temperatures. Reaction conditions: 5% NO, 10% CO, and balanced He; SV = 24,000 mL/g·h.

**Table S1.** The data of NO and CO conversions, N<sub>2</sub> selectivity, and N<sub>2</sub> yield of fresh catalysts.

| Temp./°C | %                   | Cu/CeO <sub>2</sub> | Cu/CeZr | Cu/CeCr | Cu/CeMn | Cu/CeFe | Cu/CeCo | Cu/CeSn |
|----------|---------------------|---------------------|---------|---------|---------|---------|---------|---------|
| 100      | NO con.             | 28.04               | 15.89   | 18.26   | 17.33   | 19.05   | 22.39   | 19.24   |
|          | CO con.             | 6.93                | 5.89    | 12.71   | 3.03    | 6.09    | 6.71    | 5.24    |
|          | N <sub>2</sub> sel. | 20.91               | 23.36   | 23.84   | 23.32   | 21.03   | 22.83   | 24.44   |
|          | N <sub>2</sub> yie. | 5.86                | 3.71    | 4.35    | 4.02    | 4.01    | 5.11    | 4.70    |
| 125      | NO con.             | 43.95               | 81.10   | 74.25   | 54.42   | 72.21   | 51.13   | 42.63   |
|          | CO con.             | 7.84                | 17.40   | 25.97   | 12.94   | 15.93   | 12.38   | 10.61   |
|          | N <sub>2</sub> sel. | 16.53               | 18.83   | 18.14   | 13.21   | 11.22   | 13.46   | 15.80   |
|          | N <sub>2</sub> yie. | 7.26                | 15.27   | 13.47   | 7.19    | 8.10    | 6.88    | 6.74    |
| 150      | NO con.             | 65.35               | 93.43   | 93.02   | 81.95   | 89.15   | 84.38   | 64.87   |
|          | CO con.             | 13.39               | 27.50   | 35.56   | 17.97   | 20.10   | 18.27   | 14.45   |
|          | N <sub>2</sub> sel. | 18.92               | 44.47   | 41.54   | 15.92   | 15.04   | 13.16   | 15.56   |
|          | N <sub>2</sub> yie. | 12.37               | 41.55   | 38.64   | 13.05   | 13.40   | 11.10   | 10.10   |
| 175      | NO con.             | 73.15               | 94.40   | 95.37   | 84.66   | 94.47   | 92.30   | 73.25   |
|          | CO con.             | 20.50               | 31.50   | 37.42   | 23.72   | 25.84   | 22.78   | 18.58   |
|          | N <sub>2</sub> sel. | 38.85               | 49.34   | 56.54   | 37.52   | 27.62   | 20.18   | 35.00   |
|          | N <sub>2</sub> yie. | 28.42               | 46.57   | 53.92   | 31.76   | 25.15   | 18.63   | 25.64   |
| 200      | NO con.             | 87.88               | 96.05   | 96.20   | 90.80   | 95.39   | 95.97   | 87.42   |
|          | CO con.             | 32.29               | 36.89   | 39.57   | 33.23   | 32.12   | 27.01   | 32.08   |
|          | N <sub>2</sub> sel. | 71.46               | 67.27   | 73.26   | 68.33   | 48.27   | 31.87   | 79.84   |
|          | N <sub>2</sub> yie. | 62.80               | 64.61   | 70.48   | 62.04   | 46.04   | 30.58   | 69.80   |
| 225      | NO con.             | 92.73               | 96.79   | 96.95   | 95.85   | 97.16   | 96.06   | 94.54   |
|          | CO con.             | 38.95               | 39.04   | 41.78   | 41.22   | 38.47   | 33.20   | 40.02   |
|          | N <sub>2</sub> sel. | 81.49               | 75.44   | 78.46   | 85.49   | 72.13   | 52.32   | 90.67   |
|          | N <sub>2</sub> yie. | 75.57               | 73.02   | 76.07   | 81.94   | 70.09   | 50.26   | 85.72   |
| 250      | NO con.             | 95.30               | 97.19   | 97.37   | 97.58   | 99.65   | 99.52   | 97.45   |
|          | CO con.             | 42.04               | 41.03   | 42.59   | 43.94   | 42.85   | 38.50   | 42.63   |
|          | N <sub>2</sub> sel. | 86.22               | 79.86   | 82.41   | 91.96   | 86.85   | 70.95   | 94.87   |
|          | N <sub>2</sub> yie. | 82.17               | 77.61   | 80.25   | 89.74   | 86.54   | 70.61   | 92.46   |
| 275      | NO con.             | 99.31               | 99.52   | 99.56   | 100     | 100     | 100     | 97.45   |
|          | CO con.             | 43.64               | 42.16   | 42.68   | 45.14   | 43.91   | 42.33   | 46.59   |
|          | N <sub>2</sub> sel. | 90.58               | 84.23   | 85.97   | 96.22   | 92.88   | 82.70   | 95.81   |
|          | N <sub>2</sub> yie. | 89.96               | 83.83   | 85.60   | 96.22   | 92.88   | 82.70   | 93.63   |
| 300      | NO con.             | 100                 | 100     | 100     | 100     | 100     | 100     | 98.16   |
|          | CO con.             | 44.84               | 44.18   | 42.46   | 45.34   | 44.51   | 45.09   | 46.68   |
|          | N <sub>2</sub> sel. | 93.02               | 89.17   | 90.28   | 96.57   | 95.41   | 90.19   | 100     |
|          | N <sub>2</sub> yie. | 93.02               | 89.17   | 90.28   | 96.57   | 95.41   | 90.19   | 98.16   |
| 325      | NO con.             | 100                 | 100     | 100     | 100     | 100     | 100     | 100     |
|          | CO con.             | 45.48               | 44.99   | 45.43   | 45.63   | 45.56   | 46.35   | 46.96   |
|          | N <sub>2</sub> sel. | 95.75               | 92.63   | 94.22   | 100     | 100     | 93.31   | 100     |
|          | N <sub>2</sub> yie. | 95.75               | 92.36   | 94.22   | 100     | 100     | 93.31   | 100     |
| 350      | NO con.             | 100                 | 100     | 100     | 100     | 100     | 100     | 100     |
|          | CO con.             | 45.55               | 45.64   | 46.23   | 46.22   | 45.76   | 46.80   | 47.32   |
|          | N <sub>2</sub> sel. | 97.28               | 100     | 100     | 100     | 100     | 100     | 100     |
|          | N <sub>2</sub> yie. | 97.28               | 100     | 100     | 100     | 100     | 100     | 100     |

**Table S2.** The data of NO and CO conversions, N<sub>2</sub> selectivity, and N<sub>2</sub> yield of aged catalysts.

| Temp./°C |                     | Cu/CeO <sub>2</sub> | Cu/CeZr | Cu/CeCr | Cu/CeMn | Cu/CeFe | Cu/CeCo | Cu/CeSn |
|----------|---------------------|---------------------|---------|---------|---------|---------|---------|---------|
| 100      | NO con.             | 11.58               | 8.15    | 3.85    | 8.39    | 22.56   | 10.01   | 12.86   |
|          | CO con.             | 2.04                | 3.64    | 1.52    | 1.72    | 6.50    | 3.19    | 15.31   |
|          | N <sub>2</sub> sel. | 33.95               | 44.48   | 44.23   | 44.90   | 20.06   | 31.20   | 29.77   |
|          | N <sub>2</sub> yie. | 3.93                | 3.62    | 1.70    | 3.77    | 5.88    | 3.12    | 3.83    |
| 125      | NO con.             | 32.12               | 39.06   | 10.25   | 35.13   | 44.74   | 38.14   | 39.26   |
|          | CO con.             | 7.69                | 4.71    | 2.12    | 3.35    | 12.45   | 11.50   | 21.55   |
|          | N <sub>2</sub> sel. | 20.49               | 16.91   | 37.07   | 18.61   | 16.49   | 14.83   | 17.28   |
|          | N <sub>2</sub> yie. | 6.58                | 6.60    | 3.80    | 6.54    | 7.38    | 5.66    | 6.98    |
| 150      | NO con.             | 45.81               | 54.05   | 36.01   | 48.28   | 81.26   | 63.25   | 53.80   |
|          | CO con.             | 11.38               | 5.02    | 10.58   | 5.79    | 18.59   | 16.08   | 24.30   |
|          | N <sub>2</sub> sel. | 19.47               | 20.47   | 21.13   | 16.91   | 14.38   | 11.77   | 18.66   |
|          | N <sub>2</sub> yie. | 8.92                | 11.07   | 7.61    | 8.16    | 11.73   | 7.45    | 10.04   |
| 175      | NO con.             | 57.52               | 61.89   | 60.30   | 57.56   | 91.77   | 79.03   | 58.86   |
|          | CO con.             | 14.74               | 17.99   | 19.99   | 9.4     | 24.82   | 19.84   | 26.77   |
|          | N <sub>2</sub> sel. | 25.06               | 30.14   | 32.41   | 18.58   | 21.44   | 17.72   | 29.61   |
|          | N <sub>2</sub> yie. | 14.41               | 18.65   | 19.54   | 10.69   | 19.68   | 14.01   | 17.43   |
| 200      | NO con.             | 70.65               | 77.19   | 79.47   | 67.01   | 92.60   | 84.34   | 67.90   |
|          | CO con.             | 21.70               | 25.24   | 29.21   | 19.55   | 29.14   | 26.28   | 30.83   |
|          | N <sub>2</sub> sel. | 56.85               | 52.38   | 57.27   | 30.23   | 37.87   | 35.38   | 58.02   |
|          | N <sub>2</sub> yie. | 40.16               | 40.43   | 45.51   | 20.26   | 35.07   | 29.84   | 39.40   |
| 225      | NO con.             | 88.52               | 86.76   | 86.53   | 85.17   | 97.84   | 88.72   | 83.07   |
|          | CO con.             | 32.59               | 36.54   | 33.88   | 31.78   | 38.21   | 30.52   | 39.30   |
|          | N <sub>2</sub> sel. | 81.18               | 81.26   | 70.49   | 65.52   | 67.23   | 59.11   | 85.16   |
|          | N <sub>2</sub> yie. | 71.86               | 70.50   | 61.00   | 55.80   | 65.78   | 52.44   | 70.74   |
| 250      | NO con.             | 93.61               | 93.33   | 89.53   | 93.71   | 98.99   | 93.63   | 92.96   |
|          | CO con.             | 41.64               | 43.50   | 39.51   | 40.32   | 46.52   | 41.19   | 49.31   |
|          | N <sub>2</sub> sel. | 89.24               | 90.49   | 77.57   | 85.50   | 91.81   | 79.34   | 93.26   |
|          | N <sub>2</sub> yie. | 83.53               | 84.45   | 69.45   | 80.12   | 90.88   | 74.28   | 86.69   |
| 275      | NO con.             | 96.70               | 98.65   | 93.28   | 98.95   | 99.47   | 96.84   | 97.20   |
|          | CO con.             | 44.44               | 45.27   | 43.06   | 46.60   | 48.36   | 42.94   | 51.48   |
|          | N <sub>2</sub> sel. | 91.92               | 91.13   | 86.02   | 91.36   | 93.56   | 88.70   | 97.07   |
|          | N <sub>2</sub> yie. | 88.88               | 89.90   | 80.24   | 90.40   | 93.06   | 85.90   | 94.36   |
| 300      | NO con.             | 98.01               | 99.16   | 95.25   | 99.62   | 99.67   | 97.87   | 99.26   |
|          | CO con.             | 44.72               | 48.45   | 45.61   | 48.14   | 48.62   | 46.66   | 52.37   |
|          | N <sub>2</sub> sel. | 94.99               | 95.60   | 91.74   | 94.52   | 100     | 93.01   | 99.49   |
|          | N <sub>2</sub> yie. | 93.10               | 94.80   | 87.38   | 94.16   | 99.67   | 91.03   | 98.75   |
| 325      | NO con.             | 98.30               | 99.55   | 100     | 100     | 100     | 100     | 99.60   |
|          | CO con.             | 47.14               | 48.91   | 46.98   | 48.75   | 48.93   | 47.22   | 52.92   |
|          | N <sub>2</sub> sel. | 97.24               | 97.13   | 95.92   | 98.09   | 100     | 96.27   | 99.83   |
|          | N <sub>2</sub> yie. | 95.58               | 96.70   | 95.92   | 98.09   | 100     | 96.27   | 99.43   |
| 350      | NO con.             | 99.65               | 99.71   | 100     | 100     | 100     | 100     | 100     |
|          | CO con.             | 47.20               | 49.24   | 47.98   | 49.08   | 49.13   | 47.63   | 54.00   |
|          | N <sub>2</sub> sel. | 99.45               | 98.97   | 94.22   | 100     | 100     | 99.61   | 100     |
|          | N <sub>2</sub> yie. | 99.10               | 98.68   | 94.22   | 100     | 100     | 99.61   | 100     |

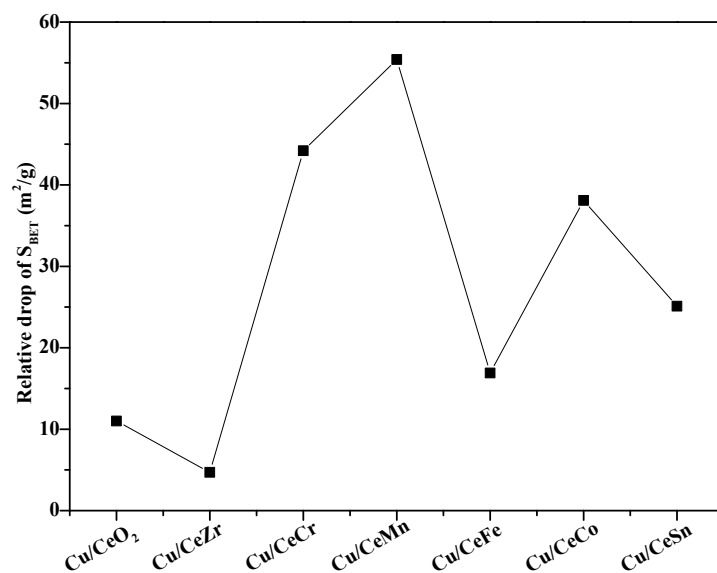

**Fig. S2.** The relative drop of  $S_{BET}$  from fresh to aged catalysts.

**Table S3.** The data information of  $A_I$ ,  $A_{II}$ , and  $A_{III}$ .

| Samples               | $A_I$               | $A_{II}$ | $A_{III}$ | $(A_I + A_{III})/A_{II}$ |        |
|-----------------------|---------------------|----------|-----------|--------------------------|--------|
| 450 °C                | Cu/CeO <sub>2</sub> | 353.67   | 32738.18  | 3417.77                  | 0.1152 |
|                       | Cu/CeZr             | 160.15   | 15916.96  | 2015.70                  | 0.1367 |
|                       | Cu/CeCr             | 235.83   | 13712.86  | 1438.51                  | 0.1221 |
|                       | Cu/CeMn             | 175.13   | 2455.29   | 697.48                   | 0.3554 |
|                       | Cu/CeFe             | 345.50   | 49968.85  | 5770.69                  | 0.1224 |
|                       | Cu/CeCo             | 295.59   | 27800.90  | 3001.60                  | 0.1186 |
|                       | Cu/CeSn             | 258.38   | 6700.79   | 1306.25                  | 0.2335 |
| 450 °C<br>+<br>700 °C | Cu/CeO <sub>2</sub> | 211.64   | 20796.50  | 1520.71                  | 0.0833 |
|                       | Cu/CeZr             | 248.14   | 4866.68   | 164.07                   | 0.0847 |
|                       | Cu/CeCr             | 223.72   | 19278.89  | 1436.19                  | 0.0861 |
|                       | Cu/CeMn             | 307.54   | 23238.04  | 2427.58                  | 0.1177 |
|                       | Cu/CeFe             | 309.32   | 35958.08  | 3232.55                  | 0.0985 |
|                       | Cu/CeCo             | 327.60   | 34648.37  | 2860.05                  | 0.0920 |
|                       | Cu/CeSn             | 278.35   | 12440.31  | 2092.77                  | 0.1906 |

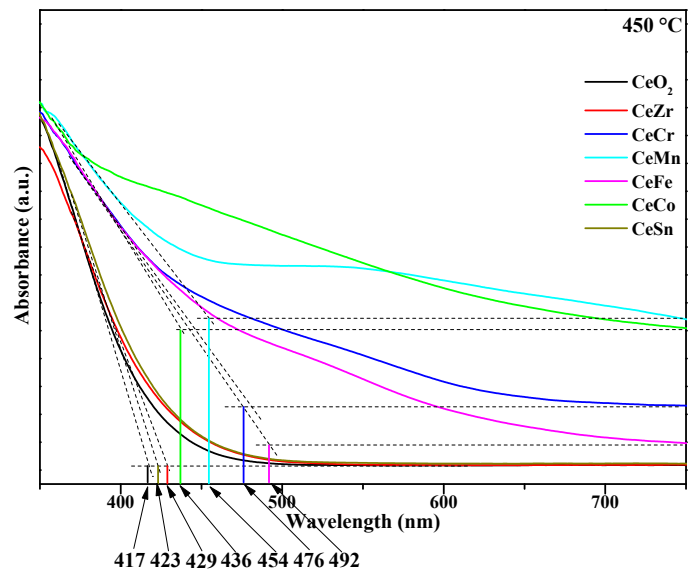

**Fig. S3.** The positions of absorption edges of these supports.
